# Supplementary material
Source: PubMed Central journal article supplement (PMC6631349)
Supplement: NIHMS1036954-supplement-Supplementary_table.pdf [file NIHMS1036954-supplement-Supplementary_table.pdf]

## Supplemental Materials

**Supplemental Table 1:** The alignment of the target sequence of UGT1A6 to the template sequences (2IYF and 1IIR) by Fugue tool.

|                 |                                                   |    |    |    |    |
|-----------------|---------------------------------------------------|----|----|----|----|
|                 | 1                                                 | 11 | 21 | 31 | 41 |
| gi 89276780 ref | MACLLPAARLPAGFLFLVLWGSVLGDKLLVVPQDGSWLSMKEIVEHLSE |    |    |    |    |
| model_s4_1      | -----KLLVVPQDGSWLSMKEIVEHLSE                      |    |    |    |    |
| liira           | -----MRVLLATCG-----SRGDTEPLVALAVRVRD              |    |    |    |    |
| hs2iyfa         | -----AHIAMFSIA-----AHGHVNPSEVIRELVA               |    |    |    |    |
|                 | 51                                                | 61 | 71 | 81 | 91 |
| gi 89276780 ref | R--GHDIVLVPEVNLLLGESKYYRR----KSFVPYNLEELRTRYRSF   |    |    |    |    |
| model_s4_1      | R--GHDIVLVPEVNLLLGESKYYRR----KSFVPYNLEELRTRYRSF   |    |    |    |    |

liira L--GADVRCAP--PD--CA-ERLAEV--G---VPHV-PV-GPRAKPLT-

hs2iyfa R--GHRVYAIP--PV--FA-DKVAAT--GPRPVLYHSTLPGPDADPEAW

101 111 121 131 141

gi|89276780|ref GNNHFAASSPLMAPLREYRNNMIVIDMCFQSCSLLKDSATLSFLRENQF

model\_s4\_1 GNNHF-----

liira -AEDVR-----RFTT--EAIATQFDEIPAAAE--GC-AAVVTGL

hs2iyfa GSTLLD-----NVEPFLNDAIQALPQLADAYADDIP-DLVLHD--

151 161 171 181 191

gi|89276780|ref DALFTDPAMPCGVILAEYKLPVYLFRGFPCSLEHMLGQSPSPVSYV--

model\_s4\_1 ---FTDPAMPCGVILAEYKLPVYLFRGFPCSLEHMLGQSPSPVSYV--

liira -LAAAIGVR----SVAEKLGIPIFYAFH-CPSYVPSPIY-PPPID-I--

hs2iyfa --ITSYPAR----VLARRWGVPVAVSLSP-N--LVAWKGYEEE-----V-A

201 211 221 231 241

gi|89276780|ref PRFYTKFSDHMTFPQRLANFIANILENYLHCLYSKYEILASDLLKRDVS

model\_s4\_1 PRFYTK---HMTFPQRLANFIANILENYLHCLYSKYEILASDLLKRDVS

liira PAQWERN--NQSAYQR---YGLLNSHRDAIGL-PPVEDIFT-FGYTDHP

hs2iyfa EPMWREP--RQTERGRA--YYARFEAWLKENGI-T--EHPDTFASHPPRS

251 261 271 281 291

gi|89276780|ref L----PALHQNSLW-LLRYDFVFEYPRPVMPNMIFIGGTNCKKKGNLSQE

model\_s4\_1 L----PALHQNSLW-LLRYDFVFEYPRPVMPNMIFIGGTNCKKKGNLSQE

liira WVAADPVLAP--LQPT-D----L-DAVQTGAWI-LP-DERP-LS----PE

hs2iyfa LVLIPKALQPH-ADRVDE-----DVYTFVGACQ-EGGWQRPA-----

301 311 321 331 341

gi|89276780|ref FEAYVNASGEHGIVVFSLSMVSEIPEKKAMEIAEALGRI--PQTVLWRY

model\_s4\_1 FEAYVNASGEHGIVVFSLG--SEIPEKKAMEIAEALGRI--PQTVLWRY

liira LAAFLD--AGPPPVYLGF-----AP-ADAVRVAIDAIRA-HG--RRVILS

hs2iyfa -----GAEKVVLVSLGS--AFTQPAFYRECVRAFGN-LP-GWHLVLQ

351 361 371 381 391

gi|89276780|ref TGT-----RPSNLAKNTILVKWL-PQNDLLGHPKARAFITHSGS

model\_s4\_1 TGT-----RPSNLAKNTILVKWL-PQNDLLGHPKARAFITHSGS

liira --RGWA-DL-V-LPDD---GADCFAIGEV-NHQVLFGR-VAAVIHHGGA

hs2iyfa IGT--PAELGE-LPD-----NVEVHDWV-PQLAILR-Q-ADLFVTHAGA

401 411 421 431 441

gi|89276780|ref HGIYEGICNGVPMVMPLF---GDQMDNAKRMETR-GAGVTLNV-----

model\_s4\_1 HGIYEGICNGVPMVMPLF---GDQMDNAKRMETR-GAGVTLNV-----

liira GTTHVAARAGAPQILLP-QM--ADQPYYAGRVAE-LGVGVAHD-----G

hs2iyfa GGSQEGLATATPMIAVP-QA--VDQFGNADMLQG-LGVARKLAT-----

451 461 471 481 491

gi|89276780|ref LEMTADDLENALKTVINNKSYPENIMRLSSLHKDRPIEPLDLAVFWVEYV

model\_s4\_1 LEMTADDLENALKTVINNKSYPKENIMRLSSLHKDRPIEPLDLAVFWVEYV

liira PIPTFDSLSAALATALT-P-ETHARATAVAGTIRT-----DGAAVAARLL

hs2iyfa -EATADLLRETALALVDDP-EVARRLRRIQAEMAQE----GGTRRAADLI

501 511 521 531 541

gi|89276780|ref MRHKGAPHLRPAAHDLTWYQYHSLDVIGFLLAIVLTVVFIVYKSCAYGCR

model\_s4\_1 MRHKGAPHLRP-----

liira LDAVSRE-----

hs2iyfa EAELPA-----

551 561

gi|89276780|ref KCFGGKGRVKKSHKSKTH

model\_s4\_1

-----

liira

-----

hsliira

-----

hs2iyfa

-----
